# Supplementary material
Source: PubMed Central journal article supplement (PMC4172386)
Supplement: Supp_Fig2.pdf [file Supp_Fig2.pdf]

**A** Karyogram of metaphase cells after 50 population doublings

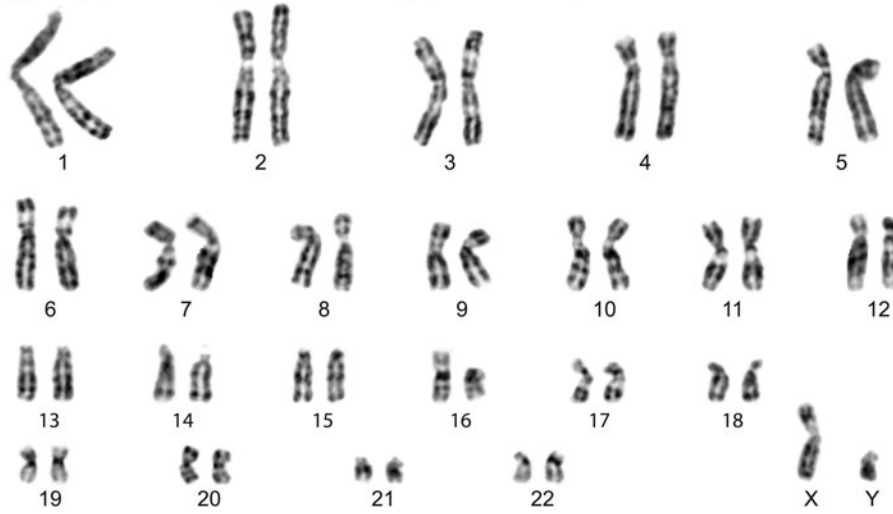

**B** Karyogram of metaphase cells after 155 population doublings

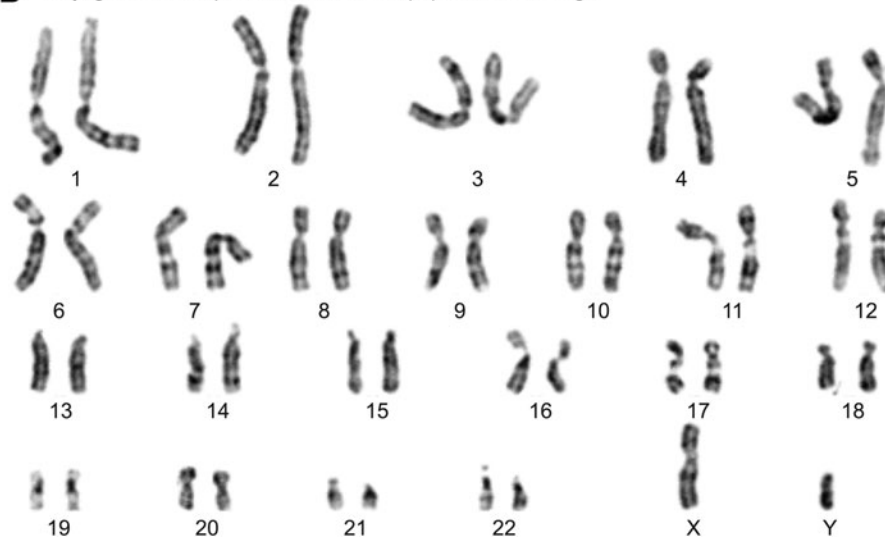

**SUPPLEMENTARY FIG. S2.** Karyotype analysis of iMSC#3 cells. Karyogram of metaphase cells after 50- (A) and 155 (B) PDs showing normal karyotypes, that is, 46, XY.
