# Supplementary material
Source: PubMed Central journal article supplement (PMC4172386)
Supplement: Supp_Fig4.pdf [file Supp_Fig4.pdf]

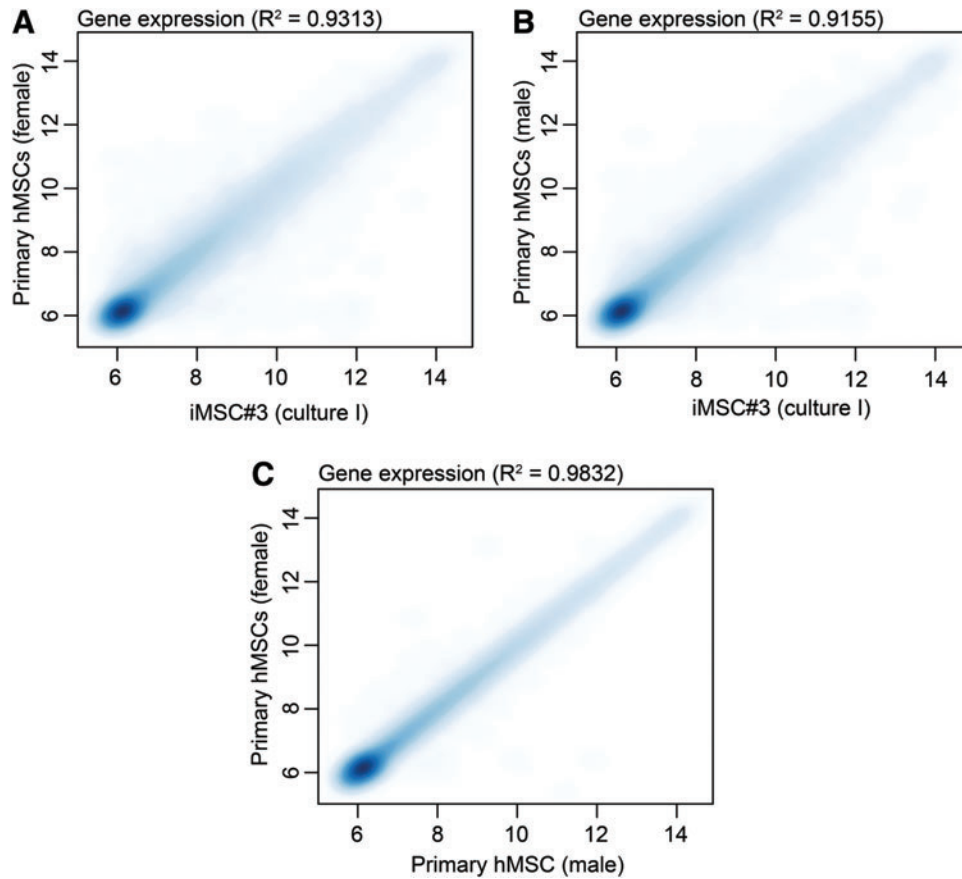

**SUPPLEMENTARY FIG. S4.** Comparisons of genome-wide expression profiles of iMSC#3 and primary hMSCs using density scatter plots. **(A)** Primary hMSCs (female donor) versus iMSC#3,  $R^2=0.93$ . **(B)** Primary hMSCs (male donor) versus iMSC#3, Correlation of determination  $R^2=0.92$ . **(C)** Primary hMSCs (female) versus primary hMSCs (male),  $R^2=0.98$ . The density scatter plots of Log2-transformed signal intensities (depicted on the axis) are shown.
