# Supplementary material
Source: PubMed Central journal article supplement (PMC4172386)
Supplement: Supp_Fig7.pdf [file Supp_Fig7.pdf]

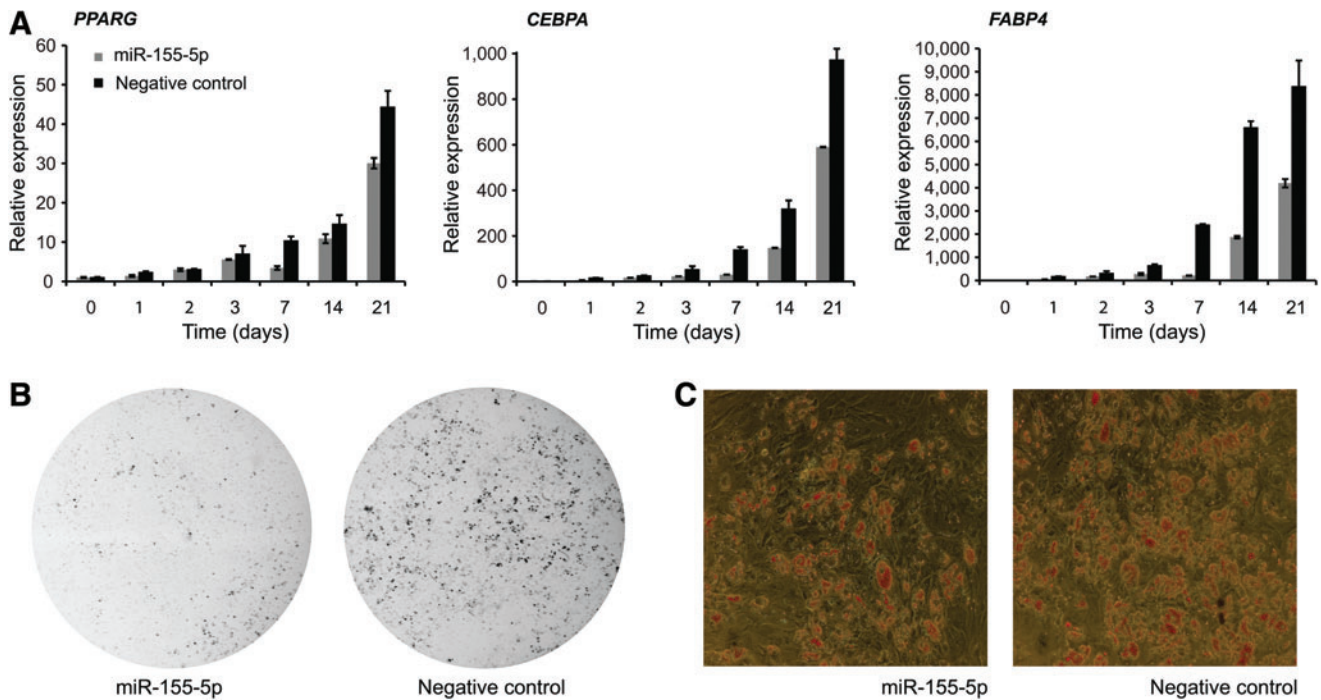

**SUPPLEMENTARY FIG. S7.** Ectopic expression of miR-155-5p inhibits adipocyte differentiation of iMSC#3. (A) iMSC#3 cells were transiently transfected with either a miR-155-5p mimic or a negative control 24 h before induction of adipogenesis. The expression levels of *PPARG*, *CEBPA*, and *FABP4* were determined using quantitative real-time PCR, and compared to the level at day 0 (set to 1). *TBP* was used to normalize the data. Error bars represent standard deviations of technical replicates. (B) Cells were fixed and stained with Oil Red O at day 21, and subsequently imaged using the GelCount (Oxford Optronix). Dark areas represent stained and differentiated cells. (C) Representative images of triglyceride accumulation at day 21 are shown at 10× magnification. *CEBPA*, CCAAT/enhancer binding protein alpha; *FABP4*, fatty acid binding protein 4; *PPARG*, peroxisome proliferator-activated receptor gamma; *TBP*, TATA box binding protein.
