# Supplementary material
Source: PubMed Central journal article supplement (PMC4172386)
Supplement: Supp_Fig8.pdf [file Supp_Fig8.pdf]

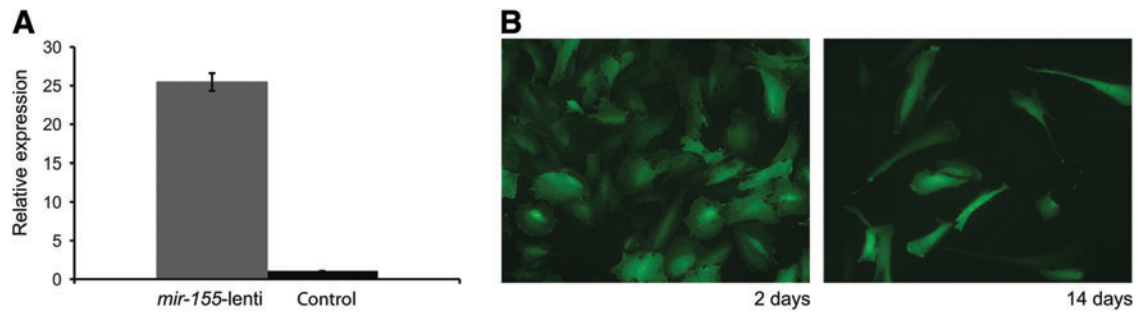

**SUPPLEMENTARY FIG. S8.** Lentivirus-mediated expression of miR-155-5p and enhanced green fluorescent protein in iMSC#3. **(A)** Shows ectopic expression of miR-155-5p in iMSC#3 cells transduced with lentiviruses that express the precursor mir-155 (mir-155-lenti) and empty control viruses (Control) after 14 days of selection using G418. The expression level of miR-155-5p was determined using quantitative real-time PCR, and compared to the level in control cells (set to 1). RNU24 was used to normalize the data. Error bars represent standard deviations of technical replicates. **(B)** iMSC#3 cells were transduced with lentiviruses expressing enhanced green fluorescent protein, and selected as above. Representative images 2 and 14 days post-transduction are shown.
