# Supplementary material
Source: PubMed Central journal article supplement (PMC4172386)
Supplement: Supp_Table1.pdf [file Supp_Table1.pdf]

## Supplementary Data

SUPPLEMENTARY TABLE S1. DNA TYPING OF iMSC#3 CELLS

| <i>Amelogenin</i> | <i>CSF1PO</i>  | <i>D13S317</i> | <i>D16S539</i> | <i>D18S51</i>  | <i>D21S11</i> | <i>D3S1359</i> | <i>D5S818</i> |
|-------------------|----------------|----------------|----------------|----------------|---------------|----------------|---------------|
| X, Y              | 11, 13         | 8, 14          | 10, 11         | 13, 18         | 18, 19, 30    | 16             | 10, 12        |
| <i>D7S820</i>     | <i>D8S1179</i> | <i>FGA</i>     | <i>Penta D</i> | <i>Penta E</i> | <i>TH01</i>   | <i>TPOX</i>    | <i>vWA</i>    |
| 9, 10             | 12, 14         | 20.2, 22.2     | 8, 11          | 12, 14         | 9, 10         | 8, 11          | 13, 14, 16    |

iMSC#3 was DNA typed using the PowerPlex 16 HS System (Promega).  
MSC, mesenchymal stromal cells.
