# Supplementary material
Source: PubMed Central journal article supplement (PMC4172386)
Supplement: Supp_Table3.pdf [file Supp_Table3.pdf]

SUPPLEMENTARY TABLE S3. OVERVIEW OF PRIMERS USED TO IDENTIFY THE INTEGRATION SITE FOR HUMAN REVERSE TRANSCRIPTASE AND TO GENERATE LENTIVIRUSES

| <i>Primer name</i>                                                     | <i>Sequence (5'-3')</i> | <i>Sequence (5'-3')</i>  |
|------------------------------------------------------------------------|-------------------------|--------------------------|
| Primers used to clone the junction between 5' LTR and host genomic DNA |                         |                          |
| <i>TERT_1_F</i> and <i>LTR_TERT_1_R</i>                                | CAACCTTTAACGTCGGATGG    | GTTTGGCCCATATTCAGCTG     |
| <i>TERT_2_F</i> and <i>LTR_TERT_2_R</i>                                | TTGTACACCCTAAGCCTCCG    | CATCTGTTCTTGGCCCTGAG     |
| Primers used to clone the junction between 3' LTR and host genomic DNA |                         |                          |
| <i>LTR_chr1_gDNA_1</i> and <i>LTR_chr1_TERT_1</i>                      | GTTTGAGCCAATGATGGTCAC   | AGGGCCAAGAACAGATGGTC     |
| <i>LTR_chr1_gDNA_2</i> and <i>LTR_chr1_TERT_2</i>                      | ATAAGCAAAAGCTGCCATCG    | GACCTGAAATGACCCTGTGC     |
| Primers used to amplify EGFP <sup>a</sup>                              |                         |                          |
| <i>EGFP_F</i> and <i>EGFP_R</i>                                        | ATGGTGAGCAAGGGCGAG      | TGATCAGTTATCTAGATCCGGTGG |
| Primers used to amplify <i>mir-155</i> <sup>a</sup>                    |                         |                          |
| <i>mir-155_F_2</i> and <i>mir-155_R_2</i>                              | CTGTCACTCCAGCTTTATAACCG | GTTTAAGGTTGAACATCCCAGTG  |

All primers were designed using Primer3 [48].

<sup>a</sup>The primers were synthesized with flanking *attB* sequences to allow Gateway cloning into pDONR 221 (Life Technologies). EGFP, enhanced green fluorescent protein; LTR, long-terminal repeat; TERT, telomerase reverse transcriptase.
